# Supplementary material
Source: publisher figshare collection journal article supplement (https://sage.figshare.com/ndownloader/files/22782113)
Supplement: Supplementary file 1 [file 22782113]

## Sheet: Enrichment
GroupID	Category	Term	Description	LogP	InTerm_InList	Symbols
1_Summary	GO Biological Processes	GO:0050900	leukocyte migration	-10.9836	13/340	Ccr2,Csf1,Epx,Cd74,Il1a,Itgb7,Serpine1,Ptpn22,S100a8,Spp1,Tnf,Itga1,Retnlg,Epha2,Col1a1,Gpnmb,Glipr2,Pirb,Tgfbr3
1_Member	GO Biological Processes	GO:0050900	leukocyte migration	-10.9836	13/340	Ccr2,Csf1,Epx,Cd74,Il1a,Itgb7,Serpine1,Ptpn22,S100a8,Spp1,Tnf,Itga1,Retnlg
1_Member	GO Biological Processes	GO:0097529	myeloid leukocyte migration	-9.47798	10/207	Ccr2,Csf1,Epx,Cd74,Il1a,Serpine1,S100a8,Spp1,Itga1,Retnlg
1_Member	GO Biological Processes	GO:0030595	leukocyte chemotaxis	-6.81922	8/212	Ccr2,Csf1,Cd74,Serpine1,S100a8,Spp1,Itga1,Retnlg
1_Member	GO Biological Processes	GO:0060326	cell chemotaxis	-6.7743	9/300	Ccr2,Csf1,Epha2,Cd74,Serpine1,S100a8,Spp1,Itga1,Retnlg
1_Member	GO Biological Processes	GO:0097530	granulocyte migration	-6.72027	7/146	Csf1,Epx,Cd74,Il1a,S100a8,Spp1,Itga1
1_Member	GO Biological Processes	GO:1990266	neutrophil migration	-4.64347	5/119	Cd74,Il1a,S100a8,Spp1,Itga1
1_Member	GO Biological Processes	GO:0002685	regulation of leukocyte migration	-4.63748	6/201	Ccr2,Csf1,Cd74,Il1a,Serpine1,Ptpn22
1_Member	GO Biological Processes	GO:0071621	granulocyte chemotaxis	-4.57423	5/123	Csf1,Cd74,S100a8,Spp1,Itga1
1_Member	GO Biological Processes	GO:0006935	chemotaxis	-4.3471	9/596	Ccr2,Csf1,Epha2,Cd74,Serpine1,S100a8,Spp1,Itga1,Retnlg
1_Member	GO Biological Processes	GO:0042330	taxis	-4.33021	9/599	Ccr2,Csf1,Epha2,Cd74,Serpine1,S100a8,Spp1,Itga1,Retnlg
1_Member	GO Biological Processes	GO:0002687	positive regulation of leukocyte migration	-4.24648	5/144	Ccr2,Csf1,Cd74,Il1a,Serpine1
1_Member	GO Biological Processes	GO:0002690	positive regulation of leukocyte chemotaxis	-3.95139	4/87	Ccr2,Csf1,Cd74,Serpine1
1_Member	GO Biological Processes	GO:0030335	positive regulation of cell migration	-3.86586	8/537	Ccr2,Col1a1,Csf1,Cd74,Il1a,Serpine1,Gpnmb,Glipr2
1_Member	GO Biological Processes	GO:2000147	positive regulation of cell motility	-3.74656	8/559	Ccr2,Col1a1,Csf1,Cd74,Il1a,Serpine1,Gpnmb,Glipr2
1_Member	GO Biological Processes	GO:0030593	neutrophil chemotaxis	-3.71745	4/100	Cd74,S100a8,Spp1,Itga1
1_Member	GO Biological Processes	GO:0051272	positive regulation of cellular component movement	-3.65813	8/576	Ccr2,Col1a1,Csf1,Cd74,Il1a,Serpine1,Gpnmb,Glipr2
1_Member	GO Biological Processes	GO:0040017	positive regulation of locomotion	-3.58266	8/591	Ccr2,Col1a1,Csf1,Cd74,Il1a,Serpine1,Gpnmb,Glipr2
1_Member	GO Biological Processes	GO:0002688	regulation of leukocyte chemotaxis	-3.52877	4/112	Ccr2,Csf1,Cd74,Serpine1
1_Member	GO Biological Processes	GO:0071675	regulation of mononuclear cell migration	-3.4043	3/50	Ccr2,Csf1,Serpine1
1_Member	GO Biological Processes	GO:0032946	positive regulation of mononuclear cell proliferation	-3.18557	4/138	Ccr2,Csf1,Cd74,Ptpn22
1_Member	GO Biological Processes	GO:0050921	positive regulation of chemotaxis	-3.16213	4/140	Ccr2,Csf1,Cd74,Serpine1
1_Member	GO Biological Processes	GO:0070665	positive regulation of leukocyte proliferation	-3.10511	4/145	Ccr2,Csf1,Cd74,Ptpn22
1_Member	GO Biological Processes	GO:0071674	mononuclear cell migration	-2.7623	3/83	Ccr2,Csf1,Serpine1
1_Member	GO Biological Processes	GO:0048872	homeostasis of number of cells	-2.685	5/316	Ccr2,Csf1,Cd74,Pirb,Tgfbr3
1_Member	GO Biological Processes	GO:0050920	regulation of chemotaxis	-2.49359	4/213	Ccr2,Csf1,Cd74,Serpine1
1_Member	GO Biological Processes	GO:0001776	leukocyte homeostasis	-2.41506	3/110	Ccr2,Cd74,Pirb
1_Member	GO Molecular Functions	GO:0019955	cytokine binding	-2.21302	3/130	Ccr2,Cd74,Tgfbr3
1_Member	GO Biological Processes	GO:0050671	positive regulation of lymphocyte proliferation	-2.15901	3/136	Ccr2,Cd74,Ptpn22
2_Summary	GO Biological Processes	GO:0030155	regulation of cell adhesion	-9.24685	15/686	Adam19,Ccr2,Col1a1,Csf1,Epha2,H2-Aa,H2-Ab1,Cd74,Serpine1,Ptpn22,Spp1,Tnf,Gpnmb,Nlrp3,Cytip,H2-Eb1,Itgb7,S100a8,Pirb,Pglyrp1,Treml4,Smpdl3b,Ciita,Ifitm6,Cybb,Tgfbr3,Itga1,Il1a,Nfe2,Plbd1
2_Member	GO Biological Processes	GO:0030155	regulation of cell adhesion	-9.24685	15/686	Adam19,Ccr2,Col1a1,Csf1,Epha2,H2-Aa,H2-Ab1,Cd74,Serpine1,Ptpn22,Spp1,Tnf,Gpnmb,Nlrp3,Cytip
2_Member	GO Cellular Components	GO:0042613	MHC class II protein complex	-8.12651	4/9	H2-Aa,H2-Ab1,H2-Eb1,Cd74
2_Member	GO Biological Processes	GO:0007159	leukocyte cell-cell adhesion	-7.67117	10/319	Ccr2,H2-Aa,H2-Ab1,Cd74,Itgb7,Ptpn22,S100a8,Tnf,Gpnmb,Nlrp3
2_Member	GO Biological Processes	GO:0019886	antigen processing and presentation of exogenous peptide antigen via MHC class II	-7.23108	4/14	H2-Aa,H2-Ab1,H2-Eb1,Cd74
2_Member	GO Biological Processes	GO:0002495	antigen processing and presentation of peptide antigen via MHC class II	-6.64775	4/19	H2-Aa,H2-Ab1,H2-Eb1,Cd74
2_Member	GO Biological Processes	GO:0045785	positive regulation of cell adhesion	-6.63378	10/412	Adam19,Ccr2,Csf1,H2-Aa,H2-Ab1,Cd74,Ptpn22,Spp1,Tnf,Nlrp3
2_Member	GO Biological Processes	GO:0002504	antigen processing and presentation of peptide or polysaccharide antigen via MHC class II	-6.55176	4/20	H2-Aa,H2-Ab1,H2-Eb1,Cd74
2_Member	GO Biological Processes	GO:0022409	positive regulation of cell-cell adhesion	-6.38077	8/242	Adam19,Ccr2,H2-Aa,H2-Ab1,Cd74,Ptpn22,Tnf,Nlrp3
2_Member	GO Cellular Components	GO:0042611	MHC protein complex	-6.29264	4/23	H2-Aa,H2-Ab1,H2-Eb1,Cd74
2_Member	GO Biological Processes	GO:0002521	leukocyte differentiation	-6.26496	11/571	Ccr2,Csf1,Epha2,H2-Aa,H2-Ab1,Cd74,Pirb,Ptpn22,Tnf,Pglyrp1,Nlrp3
2_Member	GO Biological Processes	GO:0019882	antigen processing and presentation	-6.149	6/110	H2-Aa,H2-Ab1,H2-Eb1,Cd74,Ptpn22,Treml4
2_Member	GO Biological Processes	GO:0002478	antigen processing and presentation of exogenous peptide antigen	-6.13959	4/25	H2-Aa,H2-Ab1,H2-Eb1,Cd74
2_Member	GO Biological Processes	GO:0002695	negative regulation of leukocyte activation	-6.072	7/182	Ccr2,H2-Aa,H2-Ab1,Cd74,Ptpn22,Pglyrp1,Gpnmb
2_Member	GO Biological Processes	GO:1903037	regulation of leukocyte cell-cell adhesion	-5.82322	8/287	Ccr2,H2-Aa,H2-Ab1,Cd74,Ptpn22,Tnf,Gpnmb,Nlrp3
2_Member	GO Biological Processes	GO:0022407	regulation of cell-cell adhesion	-5.78572	9/394	Adam19,Ccr2,H2-Aa,H2-Ab1,Cd74,Ptpn22,Tnf,Gpnmb,Nlrp3
2_Member	GO Biological Processes	GO:0050866	negative regulation of cell activation	-5.75482	7/203	Ccr2,H2-Aa,H2-Ab1,Cd74,Ptpn22,Pglyrp1,Gpnmb
2_Member	GO Biological Processes	GO:1903039	positive regulation of leukocyte cell-cell adhesion	-5.75482	7/203	Ccr2,H2-Aa,H2-Ab1,Cd74,Ptpn22,Tnf,Nlrp3
2_Member	GO Biological Processes	GO:0019884	antigen processing and presentation of exogenous antigen	-5.7494	4/31	H2-Aa,H2-Ab1,H2-Eb1,Cd74
2_Member	GO Biological Processes	GO:0032944	regulation of mononuclear cell proliferation	-5.43324	7/227	Ccr2,Csf1,H2-Aa,H2-Ab1,Cd74,Ptpn22,Gpnmb
2_Member	GO Biological Processes	GO:0051250	negative regulation of lymphocyte activation	-5.32952	6/152	H2-Aa,H2-Ab1,Cd74,Ptpn22,Pglyrp1,Gpnmb
2_Member	GO Biological Processes	GO:0070663	regulation of leukocyte proliferation	-5.29802	7/238	Ccr2,Csf1,H2-Aa,H2-Ab1,Cd74,Ptpn22,Gpnmb
2_Member	GO Biological Processes	GO:0098609	cell-cell adhesion	-5.27145	11/723	Adam19,Ccr2,H2-Aa,H2-Ab1,Cd74,Itgb7,Ptpn22,S100a8,Tnf,Gpnmb,Nlrp3
2_Member	GO Biological Processes	GO:0002683	negative regulation of immune system process	-5.16224	9/470	Ccr2,H2-Aa,H2-Ab1,Cd74,Ptpn22,Tnf,Pglyrp1,Gpnmb,Smpdl3b
2_Member	GO Biological Processes	GO:1902107	positive regulation of leukocyte differentiation	-5.07982	6/168	Ccr2,Csf1,H2-Aa,Cd74,Tnf,Nlrp3
2_Member	GO Biological Processes	GO:0050870	positive regulation of T cell activation	-4.81472	6/187	Ccr2,H2-Aa,H2-Ab1,Cd74,Ptpn22,Nlrp3
2_Member	GO Biological Processes	GO:0007162	negative regulation of cell adhesion	-4.80845	7/283	Col1a1,H2-Aa,H2-Ab1,Cd74,Serpine1,Ptpn22,Gpnmb
2_Member	GO Biological Processes	GO:1902105	regulation of leukocyte differentiation	-4.67352	7/297	Ccr2,Csf1,H2-Aa,Cd74,Tnf,Pglyrp1,Nlrp3
2_Member	GO Biological Processes	GO:0050868	negative regulation of T cell activation	-4.64347	5/119	H2-Aa,H2-Ab1,Cd74,Ptpn22,Gpnmb
2_Member	GO Biological Processes	GO:0002577	regulation of antigen processing and presentation	-4.61323	3/20	H2-Ab1,Cd74,Ptpn22
2_Member	GO Biological Processes	GO:0050863	regulation of T cell activation	-4.58141	7/307	Ccr2,H2-Aa,H2-Ab1,Cd74,Ptpn22,Gpnmb,Nlrp3
2_Member	GO Biological Processes	GO:0032943	mononuclear cell proliferation	-4.55443	7/310	Ccr2,Csf1,H2-Aa,H2-Ab1,Cd74,Ptpn22,Gpnmb
2_Member	GO Biological Processes	GO:1903708	positive regulation of hemopoiesis	-4.55384	6/208	Ccr2,Csf1,H2-Aa,Cd74,Tnf,Nlrp3
2_Member	GO Biological Processes	GO:1903038	negative regulation of leukocyte cell-cell adhesion	-4.44274	5/131	H2-Aa,H2-Ab1,Cd74,Ptpn22,Gpnmb
2_Member	GO Biological Processes	GO:0070661	leukocyte proliferation	-4.38171	7/330	Ccr2,Csf1,H2-Aa,H2-Ab1,Cd74,Ptpn22,Gpnmb
2_Member	GO Biological Processes	GO:0048002	antigen processing and presentation of peptide antigen	-4.37055	4/68	H2-Aa,H2-Ab1,H2-Eb1,Cd74
2_Member	GO Biological Processes	GO:0050670	regulation of lymphocyte proliferation	-4.36293	6/225	Ccr2,H2-Aa,H2-Ab1,Cd74,Ptpn22,Gpnmb
2_Member	GO Biological Processes	GO:0034341	response to interferon-gamma	-4.34967	5/137	Ciita,H2-Aa,H2-Ab1,H2-Eb1,Ifitm6
2_Member	GO Biological Processes	GO:0046635	positive regulation of alpha-beta T cell activation	-4.34554	4/69	Ccr2,H2-Ab1,Ptpn22,Nlrp3
2_Member	GO Biological Processes	GO:0002821	positive regulation of adaptive immune response	-4.20391	5/147	Ccr2,H2-Ab1,Cd74,Tnf,Nlrp3
2_Member	GO Biological Processes	GO:0002700	regulation of production of molecular mediator of immune response	-4.17605	5/149	Ccr2,Cd74,Ptpn22,Tnf,Nlrp3
2_Member	GO Biological Processes	GO:0002718	regulation of cytokine production involved in immune response	-4.03096	4/83	Ccr2,Cd74,Tnf,Nlrp3
2_Member	GO Biological Processes	GO:0002828	regulation of type 2 immune response	-4.0271	3/31	Ccr2,Cd74,Nlrp3
2_Member	GO Biological Processes	GO:0042129	regulation of T cell proliferation	-3.90586	5/170	Ccr2,H2-Aa,H2-Ab1,Ptpn22,Gpnmb
2_Member	GO Biological Processes	GO:0030098	lymphocyte differentiation	-3.87247	7/398	Ccr2,H2-Aa,H2-Ab1,Cd74,Ptpn22,Pglyrp1,Nlrp3
2_Member	GO Cellular Components	GO:0098797	plasma membrane protein complex	-3.84375	8/541	Cybb,H2-Aa,H2-Ab1,H2-Eb1,Cd74,Itgb7,Tgfbr3,Itga1
2_Member	GO Biological Processes	GO:1903706	regulation of hemopoiesis	-3.80604	7/408	Ccr2,Csf1,H2-Aa,Cd74,Tnf,Pglyrp1,Nlrp3
2_Member	GO Biological Processes	GO:0045582	positive regulation of T cell differentiation	-3.80336	4/95	Ccr2,H2-Aa,Cd74,Nlrp3
2_Member	GO Biological Processes	GO:0042092	type 2 immune response	-3.79469	3/37	Ccr2,Cd74,Nlrp3
2_Member	GO Biological Processes	GO:0051249	regulation of lymphocyte activation	-3.75186	8/558	Ccr2,H2-Aa,H2-Ab1,Cd74,Ptpn22,Pglyrp1,Gpnmb,Nlrp3
2_Member	GO Biological Processes	GO:0045619	regulation of lymphocyte differentiation	-3.73427	5/185	Ccr2,H2-Aa,Cd74,Pglyrp1,Nlrp3
2_Member	GO Biological Processes	GO:0022408	negative regulation of cell-cell adhesion	-3.72338	5/186	H2-Aa,H2-Ab1,Cd74,Ptpn22,Gpnmb
2_Member	GO Biological Processes	GO:0002449	lymphocyte mediated immunity	-3.69108	7/426	Ccr2,H2-Ab1,Cd74,Pirb,Tnf,Nlrp3,Treml4
2_Member	GO Biological Processes	GO:0002367	cytokine production involved in immune response	-3.66809	4/103	Ccr2,Cd74,Tnf,Nlrp3
2_Member	GO Cellular Components	GO:0009897	external side of plasma membrane	-3.62766	8/582	Adam19,Ccr2,H2-Aa,H2-Ab1,Cd74,Tgfbr3,Tnf,Itga1
2_Member	GO Biological Processes	GO:0046651	lymphocyte proliferation	-3.61592	6/308	Ccr2,H2-Aa,H2-Ab1,Cd74,Ptpn22,Gpnmb
2_Member	GO Biological Processes	GO:0046634	regulation of alpha-beta T cell activation	-3.60462	4/107	Ccr2,H2-Ab1,Ptpn22,Nlrp3
2_Member	GO Biological Processes	GO:0045621	positive regulation of lymphocyte differentiation	-3.58915	4/108	Ccr2,H2-Aa,Cd74,Nlrp3
2_Member	GO Biological Processes	GO:0002460	adaptive immune response based on somatic recombination of immune receptors built from immunoglobuli	-3.58758	7/443	Ccr2,H2-Ab1,Cd74,Pirb,Tnf,Nlrp3,Treml4
2_Member	GO Cellular Components	GO:0098552	side of membrane	-3.54823	9/760	Adam19,Ccr2,H2-Aa,H2-Ab1,Cd74,Ptpn22,Tgfbr3,Tnf,Itga1
2_Member	GO Biological Processes	GO:0042098	T cell proliferation	-3.51814	5/206	Ccr2,H2-Aa,H2-Ab1,Ptpn22,Gpnmb
2_Member	GO Biological Processes	GO:0002819	regulation of adaptive immune response	-3.49884	5/208	Ccr2,H2-Ab1,Cd74,Tnf,Nlrp3
2_Member	GO Biological Processes	GO:0002440	production of molecular mediator of immune response	-3.34662	6/346	Ccr2,H2-Ab1,Cd74,Ptpn22,Tnf,Nlrp3
2_Member	GO Biological Processes	GO:0042110	T cell activation	-3.29779	7/495	Ccr2,H2-Aa,H2-Ab1,Cd74,Ptpn22,Gpnmb,Nlrp3
2_Member	GO Biological Processes	GO:0002694	regulation of leukocyte activation	-3.27172	8/658	Ccr2,H2-Aa,H2-Ab1,Cd74,Ptpn22,Pglyrp1,Gpnmb,Nlrp3
2_Member	GO Biological Processes	GO:0002443	leukocyte mediated immunity	-3.23096	7/508	Ccr2,H2-Ab1,Cd74,Pirb,Tnf,Nlrp3,Treml4
2_Member	GO Biological Processes	GO:0008285	negative regulation of cell proliferation	-3.17797	8/680	H2-Aa,H2-Ab1,Il1a,Nfe2,Tgfbr3,Tnf,Gpnmb,Itga1
2_Member	GO Biological Processes	GO:0002824	positive regulation of adaptive immune response based on somatic recombination of immune receptors b	-3.16213	4/140	Ccr2,H2-Ab1,Tnf,Nlrp3
2_Member	GO Biological Processes	GO:0050865	regulation of cell activation	-3.09997	8/699	Ccr2,H2-Aa,H2-Ab1,Cd74,Ptpn22,Pglyrp1,Gpnmb,Nlrp3
2_Member	GO Biological Processes	GO:0002699	positive regulation of immune effector process	-3.06647	5/259	Ccr2,Cd74,Ptpn22,Tnf,Nlrp3
2_Member	GO Biological Processes	GO:0051048	negative regulation of secretion	-3.05151	5/261	Ccr2,Cd74,Ptpn22,Tnf,Nlrp3
2_Member	GO Biological Processes	GO:0051251	positive regulation of lymphocyte activation	-3.05148	6/394	Ccr2,H2-Aa,H2-Ab1,Cd74,Ptpn22,Nlrp3
2_Member	GO Biological Processes	GO:0045580	regulation of T cell differentiation	-3.01821	4/153	Ccr2,H2-Aa,Cd74,Nlrp3
2_Member	GO Biological Processes	GO:0042130	negative regulation of T cell proliferation	-2.97582	3/70	H2-Aa,H2-Ab1,Gpnmb
2_Member	GO Biological Processes	GO:0030217	T cell differentiation	-2.97153	5/272	Ccr2,H2-Aa,Cd74,Ptpn22,Nlrp3
2_Member	GO Biological Processes	GO:0046631	alpha-beta T cell activation	-2.94617	4/160	Ccr2,H2-Ab1,Ptpn22,Nlrp3
2_Member	GO Biological Processes	GO:0002792	negative regulation of peptide secretion	-2.92622	4/162	Cd74,Ptpn22,Tnf,Nlrp3
2_Member	GO Biological Processes	GO:0002250	adaptive immune response	-2.92075	7/574	Ccr2,H2-Ab1,Cd74,Pirb,Tnf,Nlrp3,Treml4
2_Member	GO Biological Processes	GO:0032729	positive regulation of interferon-gamma production	-2.85605	3/77	Ccr2,Ptpn22,Tnf
2_Member	GO Biological Processes	GO:0002696	positive regulation of leukocyte activation	-2.76615	6/448	Ccr2,H2-Aa,H2-Ab1,Cd74,Ptpn22,Nlrp3
2_Member	GO Biological Processes	GO:0032945	negative regulation of mononuclear cell proliferation	-2.74738	3/84	H2-Aa,H2-Ab1,Gpnmb
2_Member	GO Biological Processes	GO:0050672	negative regulation of lymphocyte proliferation	-2.74738	3/84	H2-Aa,H2-Ab1,Gpnmb
2_Member	GO Biological Processes	GO:0050867	positive regulation of cell activation	-2.69412	6/463	Ccr2,H2-Aa,H2-Ab1,Cd74,Ptpn22,Nlrp3
2_Member	GO Biological Processes	GO:0070664	negative regulation of leukocyte proliferation	-2.68955	3/88	H2-Aa,H2-Ab1,Gpnmb
2_Member	GO Biological Processes	GO:0002822	regulation of adaptive immune response based on somatic recombination of immune receptors built from	-2.65603	4/192	Ccr2,H2-Ab1,Tnf,Nlrp3
2_Member	GO Biological Processes	GO:0002702	positive regulation of production of molecular mediator of immune response	-2.5317	3/100	Cd74,Ptpn22,Nlrp3
2_Member	GO Biological Processes	GO:1903531	negative regulation of secretion by cell	-2.36151	4/232	Ccr2,Ptpn22,Tnf,Nlrp3
2_Member	GO Biological Processes	GO:0002456	T cell mediated immunity	-2.1416	3/138	Ccr2,Nlrp3,Treml4
2_Member	GO Cellular Components	GO:0005764	lysosome	-2.12332	5/429	H2-Aa,H2-Eb1,Cd74,Plbd1,Treml4
2_Member	GO Cellular Components	GO:0000323	lytic vacuole	-2.11918	5/430	H2-Aa,H2-Eb1,Cd74,Plbd1,Treml4
3_Summary	GO Biological Processes	GO:0006954	inflammatory response	-9.21213	15/690	Cd5l,Ciita,Chil3,Ccr2,Csf1,Cybb,Epha2,Hp,Il1a,Serpine1,S100a8,Tnf,Pglyrp1,Smpdl3b,Nlrp3
3_Member	GO Biological Processes	GO:0006954	inflammatory response	-9.21213	15/690	Cd5l,Ciita,Chil3,Ccr2,Csf1,Cybb,Epha2,Hp,Il1a,Serpine1,S100a8,Tnf,Pglyrp1,Smpdl3b,Nlrp3
3_Member	GO Biological Processes	GO:0050727	regulation of inflammatory response	-5.13233	8/356	Cd5l,Ccr2,Serpine1,S100a8,Tnf,Pglyrp1,Smpdl3b,Nlrp3
3_Member	GO Biological Processes	GO:0050728	negative regulation of inflammatory response	-2.05055	3/149	Pglyrp1,Smpdl3b,Nlrp3
4_Summary	GO Biological Processes	GO:0001817	regulation of cytokine production	-7.35165	13/677	Ccr2,Cybb,Epha2,Epx,Cd74,Il1a,Serpine1,Prg2,Ptpn22,Tnf,Pglyrp1,Gpnmb,Nlrp3,Hp,Ifitm6,Treml4,Plac8
4_Member	GO Biological Processes	GO:0001817	regulation of cytokine production	-7.35165	13/677	Ccr2,Cybb,Epha2,Epx,Cd74,Il1a,Serpine1,Prg2,Ptpn22,Tnf,Pglyrp1,Gpnmb,Nlrp3
4_Member	GO Biological Processes	GO:0001816	cytokine production	-6.81556	13/753	Ccr2,Cybb,Epha2,Epx,Cd74,Il1a,Serpine1,Prg2,Ptpn22,Tnf,Pglyrp1,Gpnmb,Nlrp3
4_Member	GO Biological Processes	GO:0098542	defense response to other organism	-6.50896	12/665	Epha2,Epx,Hp,Serpine1,Prg2,Ptpn22,Tnf,Pglyrp1,Ifitm6,Nlrp3,Treml4,Plac8
4_Member	GO Biological Processes	GO:0001819	positive regulation of cytokine production	-6.31786	10/446	Ccr2,Cybb,Epx,Cd74,Il1a,Serpine1,Prg2,Ptpn22,Tnf,Nlrp3
4_Member	GO Biological Processes	GO:0001818	negative regulation of cytokine production	-6.17044	8/258	Epha2,Epx,Prg2,Ptpn22,Tnf,Pglyrp1,Gpnmb,Nlrp3
4_Member	GO Biological Processes	GO:0042742	defense response to bacterium	-5.50796	9/426	Epha2,Epx,Hp,Serpine1,Prg2,Tnf,Pglyrp1,Nlrp3,Plac8
4_Member	GO Biological Processes	GO:0032753	positive regulation of interleukin-4 production	-4.36745	3/24	Epx,Prg2,Nlrp3
4_Member	GO Biological Processes	GO:0032673	regulation of interleukin-4 production	-4.07042	3/30	Epx,Prg2,Nlrp3
4_Member	GO Biological Processes	GO:0032633	interleukin-4 production	-3.79469	3/37	Epx,Prg2,Nlrp3
4_Member	GO Biological Processes	GO:0050830	defense response to Gram-positive bacterium	-3.29579	4/129	Epha2,Tnf,Pglyrp1,Nlrp3
5_Summary	GO Biological Processes	GO:0031347	regulation of defense response	-6.69444	12/639	Cd5l,Ccr2,Ifi203,Cd74,Serpine1,Ptpn22,S100a8,Tnf,Pglyrp1,Smpdl3b,Nlrp3,Treml4,Csf1,Hp,Il1a,H2-Ab1,Maff,Ifitm6,Tgfbr3,Ccdc88c,Epha2,Ppp1r15a,Itga1,Spp1,Pi16,Sgk1
5_Member	GO Biological Processes	GO:0031347	regulation of defense response	-6.69444	12/639	Cd5l,Ccr2,Ifi203,Cd74,Serpine1,Ptpn22,S100a8,Tnf,Pglyrp1,Smpdl3b,Nlrp3,Treml4
5_Member	GO Biological Processes	GO:0031349	positive regulation of defense response	-6.00142	9/371	Ccr2,Ifi203,Cd74,Serpine1,Ptpn22,S100a8,Tnf,Smpdl3b,Treml4
5_Member	GO Biological Processes	GO:0032101	regulation of response to external stimulus	-5.8308	12/771	Cd5l,Ccr2,Csf1,Cd74,Serpine1,Ptpn22,S100a8,Tnf,Pglyrp1,Smpdl3b,Nlrp3,Treml4
5_Member	GO Biological Processes	GO:0002697	regulation of immune effector process	-4.5992	8/422	Cd5l,Ccr2,Cd74,Ptpn22,Tnf,Pglyrp1,Nlrp3,Treml4
5_Member	GO Biological Processes	GO:0002526	acute inflammatory response	-4.59131	5/122	Cd5l,Hp,Il1a,Tnf,Nlrp3
5_Member	GO Biological Processes	GO:0050778	positive regulation of immune response	-4.3457	10/747	Cd5l,Ccr2,H2-Ab1,Ifi203,Cd74,Ptpn22,Tnf,Smpdl3b,Nlrp3,Treml4
5_Member	GO Biological Processes	GO:0045089	positive regulation of innate immune response	-4.28888	6/232	Ifi203,Cd74,Ptpn22,Tnf,Smpdl3b,Treml4
5_Member	GO Biological Processes	GO:0002218	activation of innate immune response	-3.97918	5/164	Ifi203,Ptpn22,Tnf,Smpdl3b,Treml4
5_Member	GO Biological Processes	GO:0045088	regulation of innate immune response	-3.79797	6/285	Ifi203,Cd74,Ptpn22,Tnf,Smpdl3b,Treml4
5_Member	GO Biological Processes	GO:0002224	toll-like receptor signaling pathway	-3.66809	4/103	Ptpn22,Tnf,Smpdl3b,Treml4
5_Member	GO Biological Processes	GO:0006953	acute-phase response	-3.66088	3/41	Hp,Il1a,Tnf
5_Member	GO Biological Processes	GO:0002221	pattern recognition receptor signaling pathway	-3.19742	4/137	Ptpn22,Tnf,Smpdl3b,Treml4
5_Member	GO Biological Processes	GO:0002758	innate immune response-activating signal transduction	-3.1738	4/139	Ptpn22,Tnf,Smpdl3b,Treml4
5_Member	GO Biological Processes	GO:0032677	regulation of interleukin-8 production	-3.15004	3/61	Serpine1,Ptpn22,Tnf
5_Member	GO Biological Processes	GO:0034121	regulation of toll-like receptor signaling pathway	-3.10906	3/63	Ptpn22,Smpdl3b,Treml4
5_Member	GO Biological Processes	GO:0030856	regulation of epithelial cell differentiation	-3.07192	4/148	Il1a,Maff,Serpine1,Tnf
5_Member	GO Biological Processes	GO:0050715	positive regulation of cytokine secretion	-3.06102	4/149	Il1a,Ptpn22,Tnf,Nlrp3
5_Member	GO Biological Processes	GO:0002673	regulation of acute inflammatory response	-3.03111	3/67	Cd5l,Tnf,Nlrp3
5_Member	GO Biological Processes	GO:0032637	interleukin-8 production	-3.03111	3/67	Serpine1,Ptpn22,Tnf
5_Member	GO Biological Processes	GO:0050710	negative regulation of cytokine secretion	-3.03111	3/67	Ptpn22,Tnf,Nlrp3
5_Member	GO Biological Processes	GO:0009615	response to virus	-2.98579	5/270	Ptpn22,Tnf,Ifitm6,Nlrp3,Treml4
5_Member	GO Biological Processes	GO:0043900	regulation of multi-organism process	-2.98422	6/406	Cd74,Ptpn22,Tnf,Pglyrp1,Ifitm6,Treml4
5_Member	GO Biological Processes	GO:0006919	activation of cysteine-type endopeptidase activity involved in apoptotic process	-2.94034	3/72	S100a8,Tnf,Nlrp3
5_Member	GO Biological Processes	GO:0031098	stress-activated protein kinase signaling cascade	-2.81561	5/295	Il1a,Ptpn22,Tgfbr3,Tnf,Ccdc88c
5_Member	GO Biological Processes	GO:0046328	regulation of JNK cascade	-2.66426	4/191	Il1a,Ptpn22,Tgfbr3,Tnf
5_Member	GO Biological Processes	GO:0002793	positive regulation of peptide secretion	-2.60911	5/329	Il1a,Ptpn22,S100a8,Tnf,Nlrp3
5_Member	GO Biological Processes	GO:0007254	JNK cascade	-2.54565	4/206	Il1a,Ptpn22,Tgfbr3,Tnf
5_Member	GO Biological Processes	GO:0051345	positive regulation of hydrolase activity	-2.51083	6/504	Epha2,Ppp1r15a,S100a8,Tnf,Itga1,Nlrp3
5_Member	GO Biological Processes	GO:1901222	regulation of NIK/NF-kappaB signaling	-2.50739	3/102	Ptpn22,Tnf,Nlrp3
5_Member	GO Biological Processes	GO:0050707	regulation of cytokine secretion	-2.5009	4/212	Il1a,Ptpn22,Tnf,Nlrp3
5_Member	GO Biological Processes	GO:0038061	NIK/NF-kappaB signaling	-2.43744	3/108	Ptpn22,Tnf,Nlrp3
5_Member	GO Biological Processes	GO:0002253	activation of immune response	-2.41986	6/526	Cd5l,Ifi203,Ptpn22,Tnf,Smpdl3b,Treml4
5_Member	GO Biological Processes	GO:0002791	regulation of peptide secretion	-2.41583	6/527	Cd74,Il1a,Ptpn22,S100a8,Tnf,Nlrp3
5_Member	GO Biological Processes	GO:0051047	positive regulation of secretion	-2.41583	6/527	Il1a,Ptpn22,S100a8,Spp1,Tnf,Nlrp3
5_Member	GO Biological Processes	GO:0051607	defense response to virus	-2.39504	4/227	Ptpn22,Ifitm6,Nlrp3,Treml4
5_Member	GO Biological Processes	GO:0043280	positive regulation of cysteine-type endopeptidase activity involved in apoptotic process	-2.3716	3/114	S100a8,Tnf,Nlrp3
5_Member	GO Biological Processes	GO:0032872	regulation of stress-activated MAPK cascade	-2.33528	4/236	Il1a,Ptpn22,Tgfbr3,Tnf
5_Member	GO Biological Processes	GO:0070302	regulation of stress-activated protein kinase signaling cascade	-2.32235	4/238	Il1a,Ptpn22,Tgfbr3,Tnf
5_Member	GO Biological Processes	GO:0050663	cytokine secretion	-2.29057	4/243	Il1a,Ptpn22,Tnf,Nlrp3
5_Member	GO Biological Processes	GO:0051092	positive regulation of NF-kappaB transcription factor activity	-2.22229	3/129	Tgfbr3,Tnf,Nlrp3
5_Member	GO Biological Processes	GO:0052547	regulation of peptidase activity	-2.22205	5/406	Serpine1,S100a8,Tnf,Pi16,Nlrp3
5_Member	GO Biological Processes	GO:2001056	positive regulation of cysteine-type endopeptidase activity	-2.20383	3/131	S100a8,Tnf,Nlrp3
5_Member	GO Biological Processes	GO:0051403	stress-activated MAPK cascade	-2.17635	4/262	Il1a,Ptpn22,Tgfbr3,Tnf
5_Member	GO Biological Processes	GO:0071396	cellular response to lipid	-2.10845	6/611	Serpine1,Ptpn22,Sgk1,Spp1,Tnf,Nlrp3
5_Member	GO Biological Processes	GO:0071222	cellular response to lipopolysaccharide	-2.07137	4/281	Serpine1,Ptpn22,Tnf,Nlrp3
5_Member	GO Biological Processes	GO:0010950	positive regulation of endopeptidase activity	-2.05851	3/148	S100a8,Tnf,Nlrp3
5_Member	GO Biological Processes	GO:0071219	cellular response to molecule of bacterial origin	-2.02963	4/289	Serpine1,Ptpn22,Tnf,Nlrp3
5_Member	GO Biological Processes	GO:0032675	regulation of interleukin-6 production	-2.02701	3/152	Il1a,Ptpn22,Tnf
5_Member	GO Biological Processes	GO:0050709	negative regulation of protein secretion	-2.02701	3/152	Ptpn22,Tnf,Nlrp3
6_Summary	GO Biological Processes	GO:0045123	cellular extravasation	-5.93709	5/65	Ccr2,Il1a,Itgb7,Tnf,Itga1,Cybb,Csf1,Cd74,Serpine1,S100a8,Ptpn22,Pglyrp1,Vcan,Smpdl3b,Plac8,Spp1,Cd5l,H2-Ab1
6_Member	GO Biological Processes	GO:0045123	cellular extravasation	-5.93709	5/65	Ccr2,Il1a,Itgb7,Tnf,Itga1
6_Member	GO Biological Processes	GO:0042108	positive regulation of cytokine biosynthetic process	-4.29665	4/71	Ccr2,Cybb,Il1a,Tnf
6_Member	GO Biological Processes	GO:0050901	leukocyte tethering or rolling	-4.21018	3/27	Ccr2,Itgb7,Tnf
6_Member	GO Biological Processes	GO:0061756	leukocyte adhesion to vascular endothelial cell	-3.79469	3/37	Ccr2,Itgb7,Tnf
6_Member	GO Biological Processes	GO:0042035	regulation of cytokine biosynthetic process	-3.60462	4/107	Ccr2,Cybb,Il1a,Tnf
6_Member	GO Biological Processes	GO:0032103	positive regulation of response to external stimulus	-3.57838	6/313	Ccr2,Csf1,Cd74,Serpine1,S100a8,Tnf
6_Member	GO Biological Processes	GO:0032649	regulation of interferon-gamma production	-3.55866	4/110	Ccr2,Ptpn22,Tnf,Pglyrp1
6_Member	GO Biological Processes	GO:0042089	cytokine biosynthetic process	-3.4285	4/119	Ccr2,Cybb,Il1a,Tnf
6_Member	GO Biological Processes	GO:0032609	interferon-gamma production	-3.37402	4/123	Ccr2,Ptpn22,Tnf,Pglyrp1
6_Member	GO Biological Processes	GO:0042107	cytokine metabolic process	-3.37402	4/123	Ccr2,Cybb,Il1a,Tnf
6_Member	GO Biological Processes	GO:0008347	glial cell migration	-3.19246	3/59	Ccr2,Csf1,Vcan
6_Member	GO Biological Processes	GO:0050729	positive regulation of inflammatory response	-3.12766	4/143	Ccr2,Serpine1,S100a8,Tnf
6_Member	GO Biological Processes	GO:0050777	negative regulation of immune response	-2.99726	4/155	Ccr2,Tnf,Pglyrp1,Smpdl3b
6_Member	GO Biological Processes	GO:0001659	temperature homeostasis	-2.76691	4/179	Ccr2,Il1a,Tnf,Plac8
6_Member	GO Biological Processes	GO:0042063	gliogenesis	-2.64953	5/322	Ccr2,Csf1,Vcan,S100a8,Tnf
6_Member	GO Biological Processes	GO:0014015	positive regulation of gliogenesis	-2.63448	3/92	Ccr2,Csf1,Tnf
6_Member	GO Biological Processes	GO:0048871	multicellular organismal homeostasis	-2.58454	6/487	Ccr2,Csf1,Il1a,Spp1,Tnf,Plac8
6_Member	GO Biological Processes	GO:0006959	humoral immune response	-2.46734	5/355	Cd5l,Ccr2,H2-Ab1,Tnf,Pglyrp1
6_Member	GO Biological Processes	GO:0002698	negative regulation of immune effector process	-2.17672	3/134	Ccr2,Tnf,Pglyrp1
6_Member	GO Biological Processes	GO:0019233	sensory perception of pain	-2.09925	3/143	Ccr2,Il1a,Tnf
6_Member	GO Biological Processes	GO:0014013	regulation of gliogenesis	-2.01161	3/154	Ccr2,Csf1,Tnf
7_Summary	GO Cellular Components	GO:0005583	fibrillar collagen trimer	-5.44471	3/11	Col5a2,Col1a1,Col1a2,Adam19,Vcan,Serpine1,Prg2,Tgfbr3,F13a1,Csf1,Epha2,Nfe2,Spp1,Tnf,Il1a,Cd74,Ptpn22,Sgk1,Nlrp3
7_Member	GO Cellular Components	GO:0005583	fibrillar collagen trimer	-5.44471	3/11	Col5a2,Col1a1,Col1a2
7_Member	GO Cellular Components	GO:0098643	banded collagen fibril	-5.44471	3/11	Col5a2,Col1a1,Col1a2
7_Member	GO Cellular Components	GO:0031012	extracellular matrix	-5.13264	9/474	Adam19,Col5a2,Col1a1,Col1a2,Vcan,Serpine1,Prg2,Tgfbr3,F13a1
7_Member	GO Cellular Components	GO:0062023	collagen-containing extracellular matrix	-5.10575	8/359	Adam19,Col5a2,Col1a1,Col1a2,Vcan,Serpine1,Prg2,F13a1
7_Member	GO Cellular Components	GO:0098644	complex of collagen trimers	-4.91842	3/16	Col5a2,Col1a1,Col1a2
7_Member	GO Biological Processes	GO:0001503	ossification	-4.90174	8/383	Col1a1,Col1a2,Csf1,Epha2,Nfe2,Spp1,Tgfbr3,Tnf
7_Member	GO Cellular Components	GO:0044420	extracellular matrix component	-4.86793	4/51	Col5a2,Col1a1,Col1a2,Vcan
7_Member	GO Molecular Functions	GO:0005201	extracellular matrix structural constituent	-4.30477	5/140	Col5a2,Col1a1,Col1a2,Vcan,Prg2
7_Member	GO Biological Processes	GO:0043588	skin development	-3.78149	6/287	Col5a2,Col1a1,Col1a2,Epha2,Il1a,Tnf
7_Member	GO Molecular Functions	GO:0030020	extracellular matrix structural constituent conferring tensile strength	-3.75986	3/38	Col5a2,Col1a1,Col1a2
7_Member	GO Biological Processes	GO:0032963	collagen metabolic process	-3.57383	4/109	Col1a1,Col1a2,Serpine1,Tgfbr3
7_Member	GO Biological Processes	GO:0001649	osteoblast differentiation	-3.56732	5/201	Col1a1,Epha2,Spp1,Tgfbr3,Tnf
7_Member	GO Biological Processes	GO:0030199	collagen fibril organization	-3.30555	3/54	Col5a2,Col1a1,Col1a2
7_Member	GO Molecular Functions	GO:0002020	protease binding	-3.11634	4/144	Col1a1,Col1a2,Serpine1,Tnf
7_Member	GO Biological Processes	GO:0070206	protein trimerization	-3.10906	3/63	Col1a1,Col1a2,Cd74
7_Member	GO Biological Processes	GO:0071417	cellular response to organonitrogen compound	-2.94712	7/568	Col5a2,Col1a1,Col1a2,Ptpn22,Sgk1,Tnf,Nlrp3
7_Member	GO Biological Processes	GO:0031214	biomineral tissue development	-2.93616	4/161	Col1a1,Col1a2,Nfe2,Spp1
7_Member	GO Biological Processes	GO:0071230	cellular response to amino acid stimulus	-2.83039	4/172	Col5a2,Col1a1,Col1a2,Tnf
7_Member	GO Cellular Components	GO:0005581	collagen trimer	-2.79272	3/81	Col5a2,Col1a1,Col1a2
7_Member	GO Molecular Functions	GO:0046332	SMAD binding	-2.74738	3/84	Col5a2,Col1a2,Tgfbr3
7_Member	GO Biological Processes	GO:0043200	response to amino acid	-2.71465	4/185	Col5a2,Col1a1,Col1a2,Tnf
7_Member	GO Biological Processes	GO:1901699	cellular response to nitrogen compound	-2.68606	7/631	Col5a2,Col1a1,Col1a2,Ptpn22,Sgk1,Tnf,Nlrp3
7_Member	GO Biological Processes	GO:0001101	response to acid chemical	-2.46734	5/355	Col5a2,Col1a1,Col1a2,Tgfbr3,Tnf
7_Member	GO Biological Processes	GO:0071229	cellular response to acid chemical	-2.12555	4/271	Col5a2,Col1a1,Col1a2,Tnf
7_Member	GO Biological Processes	GO:0030198	extracellular matrix organization	-2.11453	4/273	Col5a2,Col1a1,Col1a2,Tnf
7_Member	GO Molecular Functions	GO:0019838	growth factor binding	-2.06653	3/147	Col1a1,Col1a2,Tgfbr3
8_Summary	GO Biological Processes	GO:0035304	regulation of protein dephosphorylation	-5.38245	5/84	Vcan,Ppp1r15a,Pirb,Tnf,Itga1,Ptpn22
8_Member	GO Biological Processes	GO:0035304	regulation of protein dephosphorylation	-5.38245	5/84	Vcan,Ppp1r15a,Pirb,Tnf,Itga1
8_Member	GO Biological Processes	GO:0043666	regulation of phosphoprotein phosphatase activity	-4.83409	4/52	Vcan,Ppp1r15a,Tnf,Itga1
8_Member	GO Biological Processes	GO:0006470	protein dephosphorylation	-4.2579	6/235	Vcan,Ppp1r15a,Pirb,Ptpn22,Tnf,Itga1
8_Member	GO Biological Processes	GO:0035303	regulation of dephosphorylation	-3.97918	5/164	Vcan,Ppp1r15a,Pirb,Tnf,Itga1
8_Member	GO Biological Processes	GO:0035307	positive regulation of protein dephosphorylation	-3.72597	3/39	Ppp1r15a,Pirb,Itga1
8_Member	GO Biological Processes	GO:0010921	regulation of phosphatase activity	-3.38746	4/122	Vcan,Ppp1r15a,Tnf,Itga1
8_Member	GO Biological Processes	GO:0035306	positive regulation of dephosphorylation	-3.32949	3/53	Ppp1r15a,Pirb,Itga1
8_Member	GO Biological Processes	GO:0016311	dephosphorylation	-3.25585	6/360	Vcan,Ppp1r15a,Pirb,Ptpn22,Tnf,Itga1
9_Summary	GO Biological Processes	GO:0048771	tissue remodeling	-4.72436	6/194	Ccr2,Epha2,Il1a,Spp1,Tgfbr3,Gpnmb,Col1a1,Col1a2,Cybb,Nfe2,Serpine1,Itgb7,F13a1,Glipr2
9_Member	GO Biological Processes	GO:0048771	tissue remodeling	-4.72436	6/194	Ccr2,Epha2,Il1a,Spp1,Tgfbr3,Gpnmb
9_Member	GO Biological Processes	GO:0001568	blood vessel development	-3.7269	9/719	Ccr2,Col1a1,Col1a2,Cybb,Epha2,Il1a,Nfe2,Serpine1,Tgfbr3
9_Member	GO Biological Processes	GO:0001944	vasculature development	-3.58642	9/751	Ccr2,Col1a1,Col1a2,Cybb,Epha2,Il1a,Nfe2,Serpine1,Tgfbr3
9_Member	GO Biological Processes	GO:0072358	cardiovascular system development	-3.53144	9/764	Ccr2,Col1a1,Col1a2,Cybb,Epha2,Il1a,Nfe2,Serpine1,Tgfbr3
9_Member	GO Biological Processes	GO:0033627	cell adhesion mediated by integrin	-3.06945	3/65	Epha2,Itgb7,Serpine1
9_Member	GO Biological Processes	GO:0045765	regulation of angiogenesis	-2.73971	5/307	Ccr2,Cybb,Epha2,Il1a,Serpine1
9_Member	GO Biological Processes	GO:1901342	regulation of vasculature development	-2.54758	5/340	Ccr2,Cybb,Epha2,Il1a,Serpine1
9_Member	GO Biological Processes	GO:0042060	wound healing	-2.42618	5/363	Ccr2,Col1a1,Il1a,Serpine1,F13a1
9_Member	GO Biological Processes	GO:0010632	regulation of epithelial cell migration	-2.40869	4/225	Epha2,Serpine1,Tgfbr3,Glipr2
9_Member	GO Biological Processes	GO:0016525	negative regulation of angiogenesis	-2.39312	3/112	Ccr2,Epha2,Serpine1
9_Member	GO Biological Processes	GO:2000181	negative regulation of blood vessel morphogenesis	-2.35048	3/116	Ccr2,Epha2,Serpine1
9_Member	GO Biological Processes	GO:1901343	negative regulation of vasculature development	-2.23163	3/128	Ccr2,Epha2,Serpine1
9_Member	GO Biological Processes	GO:0001667	ameboidal-type cell migration	-2.21762	5/407	Epha2,Itgb7,Serpine1,Tgfbr3,Glipr2
9_Member	GO Biological Processes	GO:0010631	epithelial cell migration	-2.07668	4/280	Epha2,Serpine1,Tgfbr3,Glipr2
9_Member	GO Biological Processes	GO:0048514	blood vessel morphogenesis	-2.07219	6/622	Ccr2,Cybb,Epha2,Il1a,Serpine1,Tgfbr3
9_Member	GO Biological Processes	GO:0090132	epithelium migration	-2.06607	4/282	Epha2,Serpine1,Tgfbr3,Glipr2
9_Member	GO Biological Processes	GO:0090130	tissue migration	-2.05555	4/284	Epha2,Serpine1,Tgfbr3,Glipr2
10_Summary	GO Biological Processes	GO:0070372	regulation of ERK1 and ERK2 cascade	-4.5455	7/311	Epha2,Cd74,Il1a,Ptpn22,Tgfbr3,Gpnmb,Glipr2,Ccr2,Csf1,Pirb,Tnf,Ifitm6,Itga1,H2-Ab1,Col5a2,Pglyrp1,Pi16,Serpine1,S100a8
10_Member	GO Biological Processes	GO:0070372	regulation of ERK1 and ERK2 cascade	-4.5455	7/311	Epha2,Cd74,Il1a,Ptpn22,Tgfbr3,Gpnmb,Glipr2
10_Member	GO Biological Processes	GO:0070371	ERK1 and ERK2 cascade	-4.39844	7/328	Epha2,Cd74,Il1a,Ptpn22,Tgfbr3,Gpnmb,Glipr2
10_Member	GO Biological Processes	GO:0019221	cytokine-mediated signaling pathway	-4.30778	7/339	Ccr2,Csf1,Cd74,Il1a,Pirb,Tnf,Ifitm6
10_Member	GO Biological Processes	GO:0032642	regulation of chemokine production	-3.93211	4/88	Epha2,Cd74,Il1a,Tnf
10_Member	GO Biological Processes	GO:0032602	chemokine production	-3.85725	4/92	Epha2,Cd74,Il1a,Tnf
10_Member	GO Biological Processes	GO:0043408	regulation of MAPK cascade	-3.62518	9/742	Epha2,Cd74,Il1a,Ptpn22,Tgfbr3,Tnf,Gpnmb,Itga1,Glipr2
10_Member	GO Biological Processes	GO:0002573	myeloid leukocyte differentiation	-3.41445	5/217	Csf1,Epha2,Cd74,Pirb,Tnf
10_Member	GO Biological Processes	GO:0000165	MAPK cascade	-3.389	9/799	Epha2,Cd74,Il1a,Ptpn22,Tgfbr3,Tnf,Gpnmb,Itga1,Glipr2
10_Member	GO Biological Processes	GO:0070374	positive regulation of ERK1 and ERK2 cascade	-3.37818	5/221	Cd74,Il1a,Ptpn22,Gpnmb,Glipr2
10_Member	GO Biological Processes	GO:0043410	positive regulation of MAPK cascade	-3.17106	7/520	Cd74,Il1a,Ptpn22,Tnf,Gpnmb,Itga1,Glipr2
10_Member	GO Biological Processes	GO:0032722	positive regulation of chemokine production	-3.12938	3/62	Cd74,Il1a,Tnf
10_Member	GO Biological Processes	GO:0002763	positive regulation of myeloid leukocyte differentiation	-3.08909	3/64	Csf1,Cd74,Tnf
10_Member	GO Biological Processes	GO:0030099	myeloid cell differentiation	-3.00082	6/403	Csf1,Epha2,Cd74,Pirb,Tgfbr3,Tnf
10_Member	GO Biological Processes	GO:0045639	positive regulation of myeloid cell differentiation	-2.54405	3/99	Csf1,Cd74,Tnf
10_Member	GO Biological Processes	GO:0030316	osteoclast differentiation	-2.43744	3/108	Csf1,Epha2,Tnf
10_Member	GO Biological Processes	GO:0043123	positive regulation of I-kappaB kinase/NF-kappaB signaling	-2.40403	3/111	Cd74,Il1a,Tnf
10_Member	GO Biological Processes	GO:0008630	intrinsic apoptotic signaling pathway in response to DNA damage	-2.39312	3/112	Epha2,Cd74,Tnf
10_Member	GO Biological Processes	GO:0000187	activation of MAPK activity	-2.35048	3/116	Cd74,Tnf,Itga1
10_Member	GO Biological Processes	GO:0002761	regulation of myeloid leukocyte differentiation	-2.26016	3/125	Csf1,Cd74,Tnf
10_Member	GO Biological Processes	GO:0019724	B cell mediated immunity	-2.17635	4/262	H2-Ab1,Cd74,Pirb,Tnf
10_Member	GO Biological Processes	GO:0045596	negative regulation of cell differentiation	-2.129	7/798	Col5a2,Cd74,Il1a,Tgfbr3,Tnf,Pglyrp1,Pi16
10_Member	GO Biological Processes	GO:0097190	apoptotic signaling pathway	-2.12858	6/605	Epha2,Cd74,Il1a,Serpine1,S100a8,Tnf
10_Member	GO Biological Processes	GO:1903900	regulation of viral life cycle	-2.08276	3/145	Cd74,Tnf,Ifitm6
10_Member	GO Biological Processes	GO:0022612	gland morphogenesis	-2.04264	3/150	Csf1,Epha2,Tnf
10_Member	GO Biological Processes	GO:0097193	intrinsic apoptotic signaling pathway	-2.00927	4/293	Epha2,Cd74,S100a8,Tnf
11_Summary	GO Molecular Functions	GO:0005125	cytokine activity	-3.43286	5/215	Csf1,Il1a,Spp1,Tnf,Pglyrp1,Gpnmb,Retnlg,Nes,Tgfbr3,Itga1
11_Member	GO Molecular Functions	GO:0005125	cytokine activity	-3.43286	5/215	Csf1,Il1a,Spp1,Tnf,Pglyrp1
11_Member	GO Molecular Functions	GO:0048018	receptor ligand activity	-3.33997	7/487	Csf1,Il1a,Spp1,Tnf,Pglyrp1,Gpnmb,Retnlg
11_Member	GO Molecular Functions	GO:0030545	receptor regulator activity	-3.16123	7/522	Csf1,Il1a,Spp1,Tnf,Pglyrp1,Gpnmb,Retnlg
11_Member	GO Molecular Functions	GO:0005126	cytokine receptor binding	-2.61482	5/328	Csf1,Il1a,Nes,Tgfbr3,Tnf
11_Member	GO Biological Processes	GO:1901214	regulation of neuron death	-2.39103	5/370	Csf1,Nes,Tnf,Gpnmb,Itga1
11_Member	GO Biological Processes	GO:0070997	neuron death	-2.21762	5/407	Csf1,Nes,Tnf,Gpnmb,Itga1
12_Summary	GO Biological Processes	GO:0031589	cell-substrate adhesion	-3.4004	6/338	Col1a1,Csf1,Itgb7,Serpine1,Spp1,Itga1,Sgk1,Tgfbr3,Tnf,Pi16,Plac8
12_Member	GO Biological Processes	GO:0031589	cell-substrate adhesion	-3.4004	6/338	Col1a1,Csf1,Itgb7,Serpine1,Spp1,Itga1
12_Member	GO Biological Processes	GO:0007160	cell-matrix adhesion	-2.56858	4/203	Csf1,Itgb7,Serpine1,Itga1
12_Member	GO Biological Processes	GO:0010810	regulation of cell-substrate adhesion	-2.50826	4/211	Col1a1,Csf1,Serpine1,Spp1
12_Member	GO Biological Processes	GO:0042476	odontogenesis	-2.34007	3/117	Col1a1,Csf1,Serpine1
12_Member	GO Biological Processes	GO:0040008	regulation of growth	-2.31335	7/737	Csf1,Serpine1,Sgk1,Tgfbr3,Tnf,Pi16,Plac8
12_Member	GO Biological Processes	GO:0048638	regulation of developmental growth	-2.25346	5/399	Csf1,Serpine1,Tgfbr3,Pi16,Plac8
13_Summary	GO Biological Processes	GO:0042743	hydrogen peroxide metabolic process	-3.25903	3/56	Cybb,Epx,Hp,S100a8,Tnf,Chil3
13_Member	GO Biological Processes	GO:0042743	hydrogen peroxide metabolic process	-3.25903	3/56	Cybb,Epx,Hp
13_Member	GO Molecular Functions	GO:0016209	antioxidant activity	-2.70374	3/87	Epx,Hp,S100a8
13_Member	GO Biological Processes	GO:0016999	antibiotic metabolic process	-2.18568	3/133	Cybb,Epx,Hp
13_Member	GO Biological Processes	GO:0072593	reactive oxygen species metabolic process	-2.03477	4/288	Cybb,Epx,Hp,Tnf
13_Member	GO Biological Processes	GO:0042737	drug catabolic process	-2.01928	3/153	Chil3,Epx,Hp
14_Summary	GO Biological Processes	GO:0032680	regulation of tumor necrosis factor production	-2.93616	4/161	Ccr2,Cybb,Ptpn22,Gpnmb
14_Member	GO Biological Processes	GO:0032680	regulation of tumor necrosis factor production	-2.93616	4/161	Ccr2,Cybb,Ptpn22,Gpnmb
14_Member	GO Biological Processes	GO:1903555	regulation of tumor necrosis factor superfamily cytokine production	-2.91634	4/163	Ccr2,Cybb,Ptpn22,Gpnmb
14_Member	GO Biological Processes	GO:0032640	tumor necrosis factor production	-2.90654	4/164	Ccr2,Cybb,Ptpn22,Gpnmb
14_Member	GO Biological Processes	GO:0071706	tumor necrosis factor superfamily cytokine production	-2.87751	4/167	Ccr2,Cybb,Ptpn22,Gpnmb
15_Summary	GO Biological Processes	GO:0010717	regulation of epithelial to mesenchymal transition	-2.68955	3/88	Col1a1,Tgfbr3,Glipr2
15_Member	GO Biological Processes	GO:0010717	regulation of epithelial to mesenchymal transition	-2.68955	3/88	Col1a1,Tgfbr3,Glipr2
15_Member	GO Biological Processes	GO:0001837	epithelial to mesenchymal transition	-2.16783	3/135	Col1a1,Tgfbr3,Glipr2
16_Summary	GO Molecular Functions	GO:0005539	glycosaminoglycan binding	-2.50826	4/211	Vcan,Tgfbr3,Pglyrp1,Gpnmb
16_Member	GO Molecular Functions	GO:0005539	glycosaminoglycan binding	-2.50826	4/211	Vcan,Tgfbr3,Pglyrp1,Gpnmb
17_Summary	GO Cellular Components	GO:0043235	receptor complex	-2.27171	5/395	Epha2,Cd74,Itgb7,Tgfbr3,Itga1
17_Member	GO Cellular Components	GO:0043235	receptor complex	-2.27171	5/395	Epha2,Cd74,Itgb7,Tgfbr3,Itga1
17_Member	GO Cellular Components	GO:0005925	focal adhesion	-2.02701	3/152	Epha2,Itgb7,Itga1
18_Summary	GO Molecular Functions	GO:0005178	integrin binding	-2.23163	3/128	Itgb7,Spp1,Gpnmb
18_Member	GO Molecular Functions	GO:0005178	integrin binding	-2.23163	3/128	Itgb7,Spp1,Gpnmb
19_Summary	GO Molecular Functions	GO:0030246	carbohydrate binding	-2.1311	4/270	Chil3,Vcan,Klra2,Prg2
19_Member	GO Molecular Functions	GO:0030246	carbohydrate binding	-2.1311	4/270	Chil3,Vcan,Klra2,Prg2
